# Supplementary material for: Novel outpatient management of mild to moderate COVID-19 spares hospital capacity and safeguards patient outcome: The Geneva PneumoCoV-Ambu study
Source: PubMed Central journal article supplement (PMC7932514; doi:10.1371/journal.pone.0247774), 2021-03-04
Supplement: pone.0247774.s001.pdf [file pone.0247774.s001.pdf]

database COVID-19 patients anonymized

| Patient | Age | Gender | 1st consult | 1st symptoms | 2nd consult | RT PCR SARS-CoV-2 | Type of comorbidities   | Charlson scale | temperature >38.5°C | Headaches | Chest pain | Loss of smell | ECOG | NYHA | CURB-65 | Antibiotics |
|---------|-----|--------|-------------|--------------|-------------|-------------------|-------------------------|----------------|---------------------|-----------|------------|---------------|------|------|---------|-------------|
| 1       | 2   | 1      | 03.2020     | 03.2020      | 04.2020     | 1                 | asthma                  | 0              | 0                   | 0         | 0          | 0             | 2    | 3    | 0       | 1           |
| 4       | 5   | 1      | 04.2020     | 03.2020      | 04.2020     | 1                 | none                    | 0              | 1                   | 0         | 0          | 1             | 3    | 4    | 0       | 1           |
| 7       | 2   | 0      | 04.2020     | 03.2020      | 04.2020     | 1                 | none                    | 0              | 1                   | 0         | 1          | 0             | 1    | 3    | 0       | 1           |
| 9       | 4   | 1      | 04.2020     | 03.2020      | 04.2020     | 1                 | depression              | 0              | 0                   | 1         | 1          | 0             | 3    | 3    | 0       | 1           |
| 10      | 3   | 1      | 04.2020     | 03.2020      | 04.2020     | 1                 | former smoker           | 0              | 1                   | 1         | 1          | 1             | 2    | 3    | 0       | 1           |
| 12      | 3   | 1      | 04.2020     | 03.2020      | 04.2020     | 1                 | none                    | 0              | 0                   | 1         | 0          | 0             | 1    | 1    | 0       | 1           |
| 14      | 1   | 0      | 04.2020     | 03.2020      | 04.2020     | 1                 | asthma                  | 1              | 0                   | 1         | 0          | 1             | 1    | 1    | 0       | 0           |
| 17      | 3   | 0      | 04.2020     | 04.2020      | 04.2020     | 1                 | asthma                  | 1              | 0                   | 1         | 1          | 0             | 1    | 1    | 0       | 0           |
| 18      | 4   | 0      | 03.2020     | 03.2020      | 04.2020     | 1                 | asthma                  | 1              | 0                   | 0         | 0          | 0             | 4    | 3    | 1       | 0           |
| 19      | 2   | 0      | 04.2020     | 03.2020      | 04.2020     | 1                 | none                    | 0              | 0                   | 1         | 0          | 0             | 1    | 2    | 0       | 1           |
| 20      | 5   | 0      | 04.2020     | 03.2020      | 04.2020     | 1                 | OSAS                    | 1              | 0                   | 0         | 1          | 0             | 3    | 3    | 0       | 1           |
| 21      | 3   | 1      | 04.2020     | 03.2020      | 04.2020     | 1                 | none                    | 0              | 0                   | 0         | 0          | 0             | 2    | 3    | 0       | 1           |
| 26      | 3   | 1      | 04.2020     | 03.2020      | 04.2020     | 1                 | asthma                  | 1              | 0                   | 0         | 0          | 0             | 1    | 2    | 0       | 0           |
| 28      | 4   | 1      | 04.2020     | 04.2020      | 04.2020     | 1                 | hypertension            | 0              | 1                   | 0         | 1          | 0             | 2    | 3    | 1       | 0           |
| 29      | 5   | 1      | 04.2020     | 04.2020      | 04.2020     | 1                 | former smoker           | 1              | 0                   | 0         | 0          | 0             | 2    | 3    | 1       | 0           |
| 32      | 4   | 1      | 04.2020     | 03.2020      | 04.2020     | 1                 | obesity, former smoker  | 0              | 0                   | 0         | 0          | 0             | 1    | 2    | 0       | 1           |
| 34      | 4   | 1      | 04.2020     | 04.2020      | 04.2020     | 1                 | former smoker           | 0              | 0                   | 0         | 1          | 0             | 2    | 3    | 0       | 0           |
| 36      | 4   | 1      | 04.2020     | 03.2020      | 04.2020     | 1                 | none                    | 0              | 0                   | 0         | 0          | 0             | 0    | 1    | 0       | 0           |
| 37      | 2   | 1      | 04.2020     | 03.2020      | 04.2020     | 1                 | none                    | 0              | 0                   | 0         | 0          | 0             | 1    | 2    | 0       | 0           |
| 39      | 3   | 0      | 04.2020     | 03.2020      | 04.2020     | 1                 | none                    | 0              | 0                   | 1         | 0          | 0             | 2    | 3    | 0       | 1           |
| 40      | 3   | 1      | 04.2020     | 03.2020      | 04.2020     | 1                 | none                    | 0              | 0                   | 0         | 0          | 0             | 0    | 1    | 0       | 1           |
| 41      | 2   | 1      | 04.2020     | 03.2020      | 04.2020     | 1                 | none                    | 0              | 0                   | 0         | 0          | 0             | 1    | 2    | 0       | 0           |
| 42      | 3   | 0      | 04.2020     | 04.2020      | 04.2020     | 1                 | immunosupresion         | 1              | 0                   | 0         | 0          | 0             | 2    | 3    | 0       | 0           |
| 44      | 3   | 1      | 04.2020     | 04.2020      | 04.2020     | 1                 | hypertension            | 1              | 0                   | 0         | 0          | 0             | 0    | 2    | 0       | 1           |
| 45      | 5   | 0      | 04.2020     | 04.2020      | 04.2020     | 1                 | cancer                  | 2              | 0                   | 0         | 0          | 0             | 0    | 1    | 0       | 0           |
| 46      | 4   | 1      | 04.2020     | 04.2020      | 04.2020     | 1                 | hypercholesterolemia    | 0              | 0                   | 0         | 0          | 0             | 1    | 1    | 0       | 1           |
| 49      | 4   | 1      | 04.2020     | 03.2020      | 04.2020     | 1                 | none                    | 0              | 0                   | 0         | 1          | 1             | 2    | 3    | 0       | 0           |
| 50      | 2   | 1      | 04.2020     | 04.2020      | 04.2020     | 1                 | none                    | 0              | 0                   | 0         | 1          | 1             | 0    | 1    | 0       | 1           |
| 51      | 4   | 0      | 04.2020     | 04.2020      | 04.2020     | 1                 | active smoker           | 0              | 0                   | 0         | 0          | 1             | 1    | 2    | 0       | 1           |
| 52      | 4   | 0      | 04.2020     | 04.2020      | 04.2020     | 1                 | asthma, obesity         | 0              | 1                   | 1         | 0          | 0             | 3    | 3    | 0       | 0           |
| 56      | 2   | 0      | 04.2020     | 04.2020      | 04.2020     | 1                 | none                    | 0              | 0                   | 0         | 0          | 1             | 1    | 2    | 0       | 0           |
| 58      | 3   | 0      | 04.2020     | 03.2020      | 04.2020     | 1                 | OSAS, diabetes, obesity | 0              | 0                   | 1         | 0          | 0             | 1    | 2    | 0       | 0           |
| 60      | 3   | 0      | 04.2020     | 04.2020      | 04.2020     | 1                 | active smoker           | 0              | 0                   | 0         | 0          | 0             | 0    | 1    | 0       | 0           |
| 61      | 2   | 0      | 03.2020     | 03.2020      | 04.2020     | 1                 | active smoker           | 0              | 0                   | 1         | 0          | 1             | 2    | 3    | 1       | 1           |
| 62      | 2   | 1      | 04.2020     | 03.2020      | 04.2020     | 1                 | asthma, active smoker   | 0              | 0                   | 1         | 0          | 0             | 0    | 1    | 0       | 0           |
| 64      | 3   | 0      | 03.2020     | 03.2020      | 04.2020     | 1                 | diabetes                | 1              | 0                   | 1         | 0          | 0             | 3    | 2    | 0       | 0           |

| Patient | Type of antibiotics | Days of antibiotics | Xray done | Interstitial infiltrate | Laboratory done | C-RP value (mg/l) | Follow up | Decision at follow up | Severity of COVID-19 | Hospitalization's date | Satisfaction | Consent |
|---------|---------------------|---------------------|-----------|-------------------------|-----------------|-------------------|-----------|-----------------------|----------------------|------------------------|--------------|---------|
| 1       | 1                   | 1                   | 1         | 1                       | 1               | 9                 | 0         | NA                    | 2                    |                        | 1            | 1       |
| 4       | 2                   | 2                   | 1         | 1                       | 1               | 60                | 2         | 4                     | 5                    | 5.04 - 20.04           | 0            | 1       |
| 7       | 1                   | 2                   | 1         | 1                       | 1               | 12                | 0         | NA                    | 1                    |                        | 1            | 1       |
| 9       | 1                   | 3                   | 1         | 1                       | 1               | 30                | 0         | NA                    | 2                    |                        | 0            | 1       |
| 10      | 1                   | 3                   | 1         | 1                       | 1               | 83                | 2         | NA                    | 2                    |                        | 1            | 1       |
| 12      | 3                   | 5                   | 1         | 1                       | 1               | 21                | 2         | NA                    | 1                    |                        | 1            | 1       |
| 14      | NA                  | NA                  | 1         | 0                       | 0               | NA                | 0         | NA                    | 1                    |                        | 1            | 1       |
| 17      | NA                  | NA                  | 1         | 0                       | 1               | 7                 | 0         | NA                    | 1                    |                        | 1            | 1       |
| 18      | NA                  | NA                  | 1         | 1                       | 1               | 50                | 4         | 4                     | 4                    | 6.04 - 20.04           | 1            | 1       |
| 19      | 1                   | 5                   | 1         | 1                       | 1               | 14                | 0         | NA                    | 1                    |                        | 1            | 1       |
| 20      | 2                   | 5                   | 1         | 1                       | 1               | 8                 | 4         | 4                     | 3                    | 6.04 - 08.04           | 1            | 1       |
| 21      | 1                   | 7                   | 1         | 1                       | 1               | 187               | 2         | 2                     | 2                    |                        | 1            | 1       |
| 26      | NA                  | NA                  | 1         | 0                       | 1               | 13                | 0         | NA                    | 1                    |                        | 1            | 1       |
| 28      | NA                  | NA                  | 1         | 1                       | 1               | 31                | 1         | 4                     | 4                    | 10.04 - 15.04          | 0            | 1       |
| 29      | NA                  | NA                  | 1         | 1                       | 1               | 90                | 2         | 2                     | 2                    |                        | 1            | 1       |
| 32      | 3                   | 3                   | 1         | 1                       | 1               | 19                | 0         | NA                    | 1                    |                        | 1            | 1       |
| 34      | NA                  | NA                  | 1         | 1                       | 1               | 37                | 2         | 2                     | 2                    |                        | 1            | 1       |
| 36      | NA                  | NA                  | 1         | 1                       | 1               | 104               | 0         | NA                    | 1                    |                        | 1            | 1       |
| 37      | NA                  | NA                  | 1         | 0                       | 1               | 5                 | 0         | NA                    | 1                    |                        | 1            | 1       |
| 39      | 4                   | 3                   | 1         | 1                       | 1               | NA                | 1         | 1                     | 2                    |                        | 0            | 1       |
| 40      | 1                   | 6                   | 1         | 1                       | 1               | 5                 | 0         | NA                    | 1                    |                        | 1            | 1       |
| 41      | NA                  | NA                  | 1         | 1                       | 1               | 5                 | 1         | 1                     | 1                    |                        | 1            | 1       |
| 42      | NA                  | NA                  | 1         | 0                       | 1               | 5                 | 0         | NA                    | 2                    |                        | 1            | 1       |
| 44      | 2                   | 5                   | 1         | 1                       | 1               | 74                | 4         | 4                     | 3                    | 16.04 - 18.04          | 0            | 1       |
| 45      | NA                  | NA                  | 1         | 1                       | 1               | 6                 | 2         | 1                     | 1                    |                        | 1            | 1       |
| 46      | 1                   | 5                   | 1         | 1                       | 1               | 18                | 1         | 1                     | 1                    |                        | 1            | 1       |
| 49      | NA                  | NA                  | 1         | 0                       | 1               | 5                 | 1         | 1                     | 2                    |                        | 1            | 1       |
| 50      | 2                   | 5                   | 1         | 0                       | 1               | 130               | 1         | 2                     | 1                    |                        | 1            | 1       |
| 51      | 2                   | 5                   | 1         | 1                       | 1               | 65                | 1         | 1                     | 1                    |                        | 1            | 1       |
| 52      | NA                  | NA                  | 1         | 1                       | 1               | 5                 | 1         | 1                     | 2                    |                        | 1            | 1       |
| 56      | NA                  | NA                  | 1         | 0                       | 1               | 5                 | 0         | NA                    | 1                    |                        | 1            | 1       |
| 58      | NA                  | NA                  | 1         | 0                       | 1               | 3                 | 0         | NA                    | 1                    |                        | 1            | 1       |
| 60      | NA                  | NA                  | 0         | 0                       | 0               | NA                | 0         | NA                    | 1                    |                        | 1            | 1       |
| 61      | 4                   | 3                   | 1         | 0                       | 1               | 5                 | 0         | NA                    | 2                    |                        | 0            | 1       |
| 62      | NA                  | NA                  | 1         | 0                       | 1               | 0                 | 0         | NA                    | 1                    |                        | 1            | 1       |
| 64      | NA                  | NA                  | 0         | 0                       | 0               | 5                 | 0         | NA                    | 2                    |                        | 1            | 1       |
