# Supplementary material for: Novel outpatient management of mild to moderate COVID-19 spares hospital capacity and safeguards patient outcome: The Geneva PneumoCoV-Ambu study
Source: PubMed Central journal article supplement (PMC7932514; doi:10.1371/journal.pone.0247774), 2021-03-04
Supplement: pone.0247774.s002.pdf [file pone.0247774.s002.pdf]

## Codes and Legend

|                              |                                                                                                                                                                                                                                                                                                                                                  |
|------------------------------|--------------------------------------------------------------------------------------------------------------------------------------------------------------------------------------------------------------------------------------------------------------------------------------------------------------------------------------------------|
| Age                          | 1= Range 20-30; 2= Range 30-40; 3= Range 40-50<br>4= Range 50-60; 5= Range 60-70                                                                                                                                                                                                                                                                 |
| Gender                       | Male = 1                                                                                                                                                                                                                                                                                                                                         |
| Yes                          | 1                                                                                                                                                                                                                                                                                                                                                |
| Positive                     | 1                                                                                                                                                                                                                                                                                                                                                |
| NA                           | Non applicable/non available                                                                                                                                                                                                                                                                                                                     |
| ECOG Performance status      | 0 = no limitation<br>1= limited but light work possible<br>2= limited for light work<br>3= bed rest 50% of the time<br>4= hospitalization<br>5= dead                                                                                                                                                                                             |
| NYHA dypnea                  | 1= no limitation<br>2= limitation with intense effort<br>3= limitation with small effort<br>4= dypsnea at rest                                                                                                                                                                                                                                   |
| CURB-65 score                | 1pt confusion<br>1pt urea >7mmol/l<br>1pt Respiration rate >30/min<br>1pt Blood pressure systolic >90mmHg or diastolic < 60mmHg<br>1pt >65 years old                                                                                                                                                                                             |
| Type of antibiotics          | 1=amoxicilline<br>2= amoxicilline/clavulanic acid<br>3= doxycycline<br>4=other                                                                                                                                                                                                                                                                   |
| Follow up                    | 0= primary care physician/Covicare<br>1= AFU at 48h<br>2= AFU at 24h<br>3= transfert to ED<br>4= direct hospitalization                                                                                                                                                                                                                          |
| Decision at follow up        | 1= return home<br>2= enhance follow-up<br>3= transfert to ED<br>4= hospitalization                                                                                                                                                                                                                                                               |
| Severity of COVID-19 disease | 1= not hospitalised no limitation of activities<br>2= not hospitalised, limitation of activities<br>3= hospitalised, not requiring supplementary oxygen<br>4= hospitalised, requiring supplementary oxygen<br>5= hospitalised, on non-invasive mechanical ventilation<br>6= hospitalised, on invasive mechanical ventilation or ECMO<br>7= death |
